# Supplementary material for: pH-dependent nano-capturing of tartaric acid using dendrimers
Source: Royal Society of Chemistry journal article supplement (doi:10.1039/c3sm52255e), 2013-11-15
Supplement: c3sm52255e.pdf [file c3sm52255e.pdf]

## Supplementary Information for *pH*-Dependent Nano-Capturing of Tartaric Acid using Dendrimers

Oana G. Schramm\*, Xaviera López-Cortés, Leonardo S. Santos, V. Felipe Laurie, Fernando Danilo González Nilo, Michal Krolík, Rainer Fischer, Stefano Di Fiore

### Supporting Figures

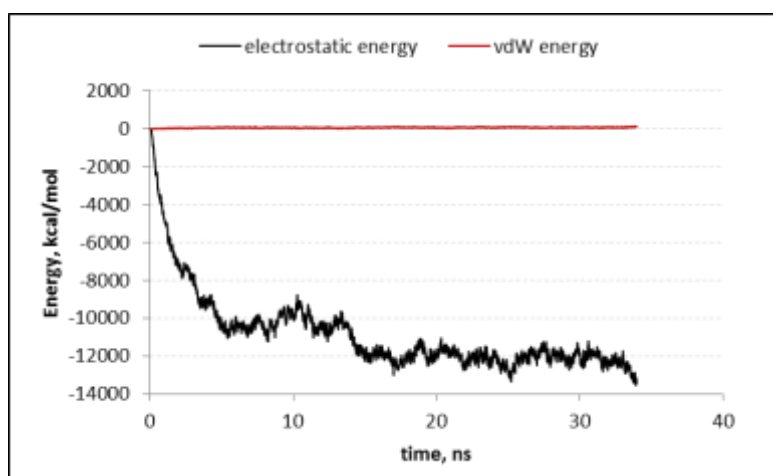

**Fig. S1:** Graphical representation of electrostatic vs van der Waals (vdW) energy between PAMAM G5 and TA molecules within a distance of 8.5 Å with respect to any atom of the dendrimer for 100TA:1PAMAM system.

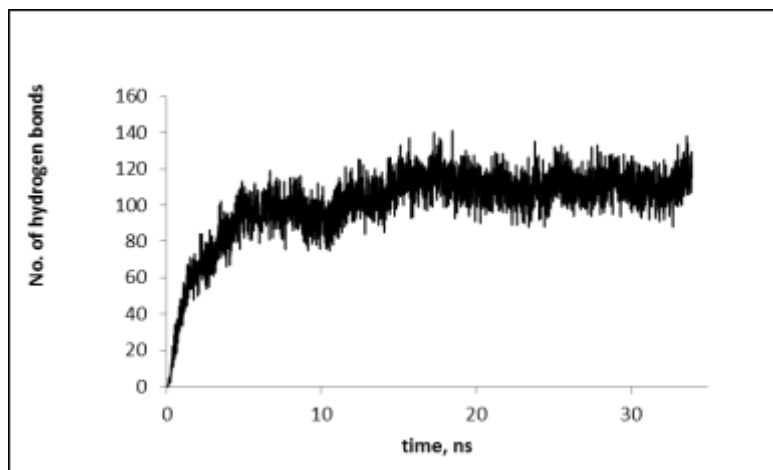

**Fig. S2:** Number of hydrogen bonds between PAMAM G5 and TA molecules among the MD simulation (34 ns in total) for 100TA:1PAMAM system. The average is 110 hydrogen bonds for the last 4 ns.
